# Supplementary material
Source: HighWire-hosted journal article supplement (https://jme.bmj.com/content/44/3/201)
Supplement: inline-supplementary-material-1 [file inline-supplementary-material-1.pdf]

## Do Not Attempt Resuscitation Questionnaire (DNAR)

The following questionnaire is aimed at establishing healthcare professionals' attitudes towards DNAR orders and their understanding of them. DNAR is a newer term that has replaced the previous Do Not Resuscitate (DNR) orders.

\*Required

**1) What is your job title?\*** (mark only 1)

Options: Staff Nurse, CNM, CNS, ANP, Intern, SHO, Registrar, SpR, Consultant, GP

**2) Age of Participant:\***

Options: 20-30, 31-40, 41-50, 51-60, 61-70.

**3) Years of professional experience: \*** \_\_\_\_

**4) What Specialty best describes the area in which you work?\***

Options: List of specialties

**5) DNAR means that in the event of cardiac arrest, the patient is not for resuscitation:\*** (mark only 1)

Options: True/ False

**6) A DNAR order means that a patient is:** (mark only 1)

Options: for immediate palliative care **or** for full treatment except CPR in event of cardiac arrest.

**7) If a patient has a DNAR order, they can still:\*** check all that apply. (More than one answer allowed)

receive Antibiotics ☐

receive pain relief ☐

receive Chemotherapy/ Radiotherapy ☐

receive Oxygen ☐

have Dialysis ☐

have NG feeding ☐

have Surgery ☐

have Airway suctioning ☐

have Physiotherapy ☐

be referred to hospital from home or a nursing home ☐

receive IV Fluids ☐

None of the above ☐

**8) A patient has a right to decline a treatment:\*** (mark only 1)

Options: True/ False/ Don't know

**9) A patient with decision-making capacity has a right to make a DNAR order, in the same way they can decline a treatment:\*** (mark only 1)

Options: True/ False/ Don't know

**10) A DNAR order can be made following direct discussion with a patient who has decision making capacity:\*** (mark only 1)

Options: True/ False/ Don't know

**11) When the resuscitation status of a patient in hospital is being decided, the next of kin can:\*** (mark only 1)

Inform the healthcare team of the patient's likely views on CPR ☐

Demand resuscitation or DNAR ☐

Decide on resuscitation or DNAR ☐

**12) In a patient lacking decision making capacity, who has not expressed their wishes previously, a decision regarding resuscitation can be made in their best interest by their consultant, treating SpR/ Registrar or GP, commonly in consultation with their family:\*** (mark only 1)

Options: True/ False/ Don't know

**13) When do you think a DNAR order should be discussed/ made on a patient with a life-limiting illness such as COPD, Advanced Cancer, Motor Neurone Disease etc.?(More than 1 answer allowed)**

On attending the GP Surgery ☐

On attending the Outpatients clinic ☐

After being admitted to hospital secondary to their chronic illness ☐

When they are in acute distress + unwell in the Emergency Department due to exacerbation/ decompensation/ deterioration of their chronic illness. ☐

When they are on a life support machine, in multi-organ failure and have failed all invasive therapy. ☐

**14) Do you think end-of-life care should be discussed with the patient pre-operatively? \***

Options: Yes/ No

**15) Within the hospital which grade of professional has overall responsibility for a DNAR decision? \*(mark 1 only)**

The CNM on the ward ☐

The consultant ☐

The intern on-call ☐

**16) If a patient is re-admitted to the hospital can a documented DNAR order from a previous admission be used?\***

Options: Yes/ No/ Don't know

**17) A DNAR order should be regularly reviewed if the patient has a prolonged stay in hospital or is a resident in a nursing home:\***

Options: Agree/ Disagree/ Don't know

**18) What percentage of patients are successfully resuscitated in an out-of-hospital arrest?\***

(Mark only 1)

30-40% ☐

20-25% ☐

2-5% ☐

**19) What percentage of patients are successfully resuscitated in an in-hospital arrest?\*** (Mark only 1)

15-17% ☐

50-52% ☐

30-32% ☐

**20) By having a DNAR order, I feel the quality of the patient's care is:\*** (Mark only 1)

Positively affected ☐

Negatively affected ☐

Not affected ☐

**21) Have you heard of an Advance Care Directive or Living Will?\*** (Mark only 1)

Options: Yes/ No (Skip to Q 25 if answered No)

**22) If YES, do you have one?\*** (Mark only 1)

Options: Yes/ No/ Answered no to Q21

**23) If NO in question 22, the reason is:\*** (Mark only 1)

I have decided against it as I do not agree with them ☐

I plan to make one in the future ☐

Other ☐

**24) If answered "Other" in Q 23, please explain the reason for not having an Advance Care Directive:\***

**25) Have you read the DNAR section of The National Consent Policy launched in 2013?\***

Options: Yes/No

**26) Do you think further education is required regarding DNAR orders?\***

Options: Yes/No

**27) Have you ever heard of the term “Allow Natural Death” (AND)?\***

Options: Yes/No

**28) What are your views on the term “Allow Natural Death” (positive/ negative points)?\***

---
