# Supplementary material
Source: HighWire-hosted journal article supplement (https://jme.bmj.com/content/44/3/201)
Supplement: inline-supplementary-material-2 [file inline-supplementary-material-2.pdf]

Supplementary Table 1: Characteristics of Participants

| Characteristic                                          | <u>Hospital Doctors</u><br>n= 187 |                 | <u>Nurses</u><br>n= 292 |                       | <u>Primary Care Physicians</u><br>n=40 | P value |
|---------------------------------------------------------|-----------------------------------|-----------------|-------------------------|-----------------------|----------------------------------------|---------|
|                                                         | Consultant<br>n= 69               | NCHDs<br>n= 118 | CNM/CNS/ANP<br>n= 150   | Staff Nurses<br>n=142 |                                        |         |
| <b>Years of experience, mean (SD)</b>                   | 20.3 (7.5)                        | 4.4 (4.0)       | 20.5 (8.7)              | 13.1 (9.0)            | 27.9 (11.7)                            | <0.001  |
| <b>Age of participant, n (%)</b>                        |                                   |                 |                         |                       |                                        |         |
| 20-30 years                                             | 0 (0)                             | 72 (60.0)       | 7 (5.8)                 | 41 (34.2)             | 0 (0)                                  | <0.001  |
| 31-40 years                                             | 18 (9.5)                          | 43 (22.8)       | 64 (33.9)               | 57 (30.2)             | 18 (9.5)                               |         |
| 41-50 years                                             | 34 (27.4)                         | 3 (2.4)         | 51 (41.1)               | 30 (24.2)             | 34 (27.4)                              |         |
| 51-60 years                                             | 15 (22.4)                         | 0 (0)           | 25 (37.3)               | 14 (20.9)             | 15 (22.4)                              |         |
| 61-70 years                                             | 2(10.5)                           | 0 (0)           | 3 (15.8)                | 0 (0)                 | 2 (10.5)                               |         |
| <b><u>Specialty</u></b>                                 |                                   |                 |                         |                       |                                        |         |
| <b>Medicine, n (%)</b>                                  | 25 (36.2)                         | 54 (45.8)       | 34 (22.7)               | 43 (30.3)             | NA                                     | <0.001  |
| <b>Surgery, n (%)</b>                                   | 8 (11.6)                          | 24 (20.3)       | 33 (22.0)               | 40 (28.2)             | NA                                     |         |
| <b>Intensive Care Medicine &amp; Anaesthesia, n (%)</b> | 6 (8.7)                           | 10 (8.5)        | 15 (10.0)               | 23 (16.2)             | NA                                     |         |
| <b>Emergency Medicine, n (%)</b>                        | 5 (7.3)                           | 9 (7.6)         | 12 (8.0)                | 5 (3.5)               | NA                                     |         |
| <b>Oncology/ Haematology/ Coagulation, n (%)</b>        | 11 (15.9)                         | 5 (4.2)         | 18 (12.0)               | 9 (6.3)               | NA                                     |         |
| <b>Geriatric Medicine, n (%)</b>                        | 7 (10.1)                          | 10 (8.5)        | 16 (10.7)               | 18 (12.7)             | NA                                     |         |
| <b>Other specialties, n (%)</b>                         | 7 (8.9)                           | 6 (5.1)         | 22 (14.7)               | 4 (2.8)               | NA                                     |         |

## Supplementary Table 1: Characteristics of Participants

### Footnote:

Chi-squared tests were used to analyse differences in categorical outcome variables by healthcare group, and oneway anova and kruskal wallis tests were used to analyse differences in continuous outcome variables by healthcare group. Evidence of a statistically significant difference in characteristics and responses between groups was set at  $p < 0.05$ .

**Medicine** includes Cardiology, Respiratory Medicine, Endocrinology/ Diabetes, General Internal Medicine, Genitourinary Medicine, Rheumatology, Gastrointestinal/ Hepatobiliary Medicine, Infectious Diseases, Nephrology, Neurology, Pharmacology and Therapeutics, Dermatology.

**Surgery** includes Breast surgery, Cardiothoracic Surgery, Day Surgery, Ear Nose and Throat surgery, Gastrointestinal surgery (upper and colorectal), General Surgery, Gynaecological, Maxillofacial surgery, Orthopaedic surgery, Plastic surgery, Theatre/ Recovery area, Urological and Vascular surgery.

**Other specialties** include a mixture of specialties, Chemical pathology, Histopathology, educational, Immunology, Medical Imaging, Microbiology, Night management, Pain medicine, Palliative care, Psychiatry, Nursing management, outpatient nursing, transitional care nursing.

NCHD, Non-consultant Hospital Doctors; CNM, Clinical Nurse Manager; CNS, Clinical Nurse Specialist; ANP, Advanced Nurse Practitioner; NA, Not Applicable.
