# Supplementary material
Source: HighWire-hosted journal article supplement (https://jme.bmj.com/content/44/3/201)
Supplement: inline-supplementary-material-4 [file inline-supplementary-material-4.pdf]

**Figure 4.** “Do you think end-of-life care should be discussed with the patient pre-operatively?” Responses in favour of pre-operative discussion of end-of-life care with the patient presented by specialty.

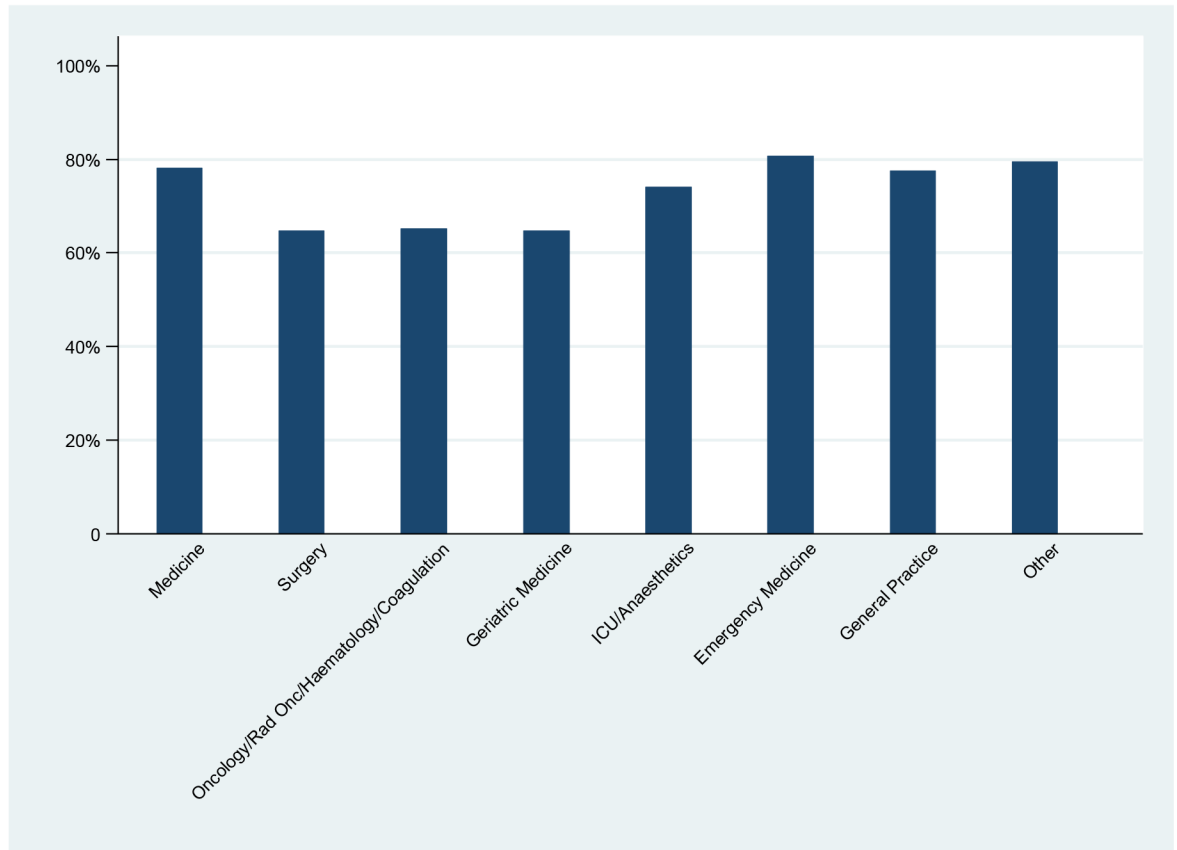

Rad Onc, Radiation Oncology.

**Other specialties** include a mixture of specialties, Chemical pathology, Histopathology, educational, Immunology, Medical Imaging, Microbiology, Night management, Pain medicine, Palliative care, Psychiatry, Nursing management, outpatient nursing, transitional care nursing.
