# Supplementary material
Source: HighWire-hosted journal article supplement (https://jme.bmj.com/content/44/3/201)
Supplement: inline-supplementary-material-6 [file inline-supplementary-material-6.pdf]

FIGURE 2: Estimation of successful resuscitation rates in cardiac arrest amongst healthcare professionals.

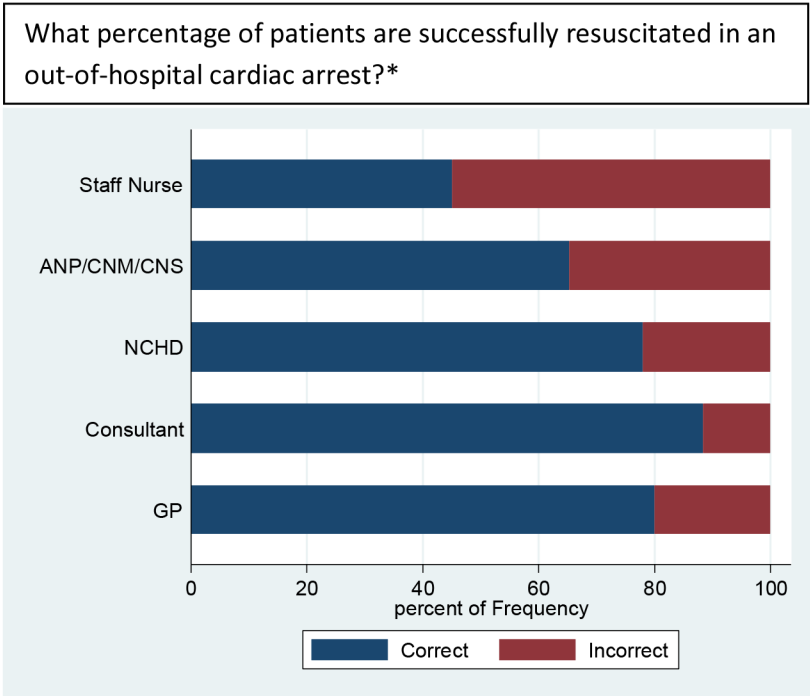

\*MCQ options:  
30-40%  
20-25%  
**2-5% (correct response)**

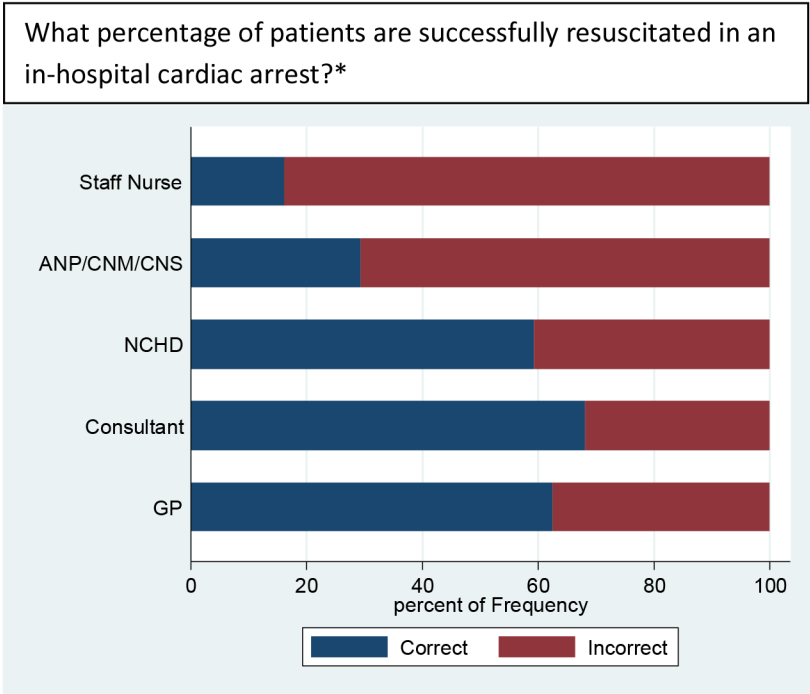

\*MCQ options:  
**15-17% (correct response)**  
50-52%  
30-32%

ANP, Advanced Nurse Practitioner; CNM, Clinical Nurse Manager; CNS, Clinical Nurse Specialist; NCHD, Non-consultant Hospital Doctor; GP, General Practitioner(Primary Care Physician).
