# Supplementary material
Source: HighWire-hosted journal article supplement (https://jme.bmj.com/content/44/3/201)
Supplement: inline-supplementary-material-8 [file inline-supplementary-material-8.pdf]

Figure 3. When do you think a DNAR order should be discussed/ made on a patient with a life-limiting illness? (such as COPD, advanced cancer, motor neuron disease etc.)

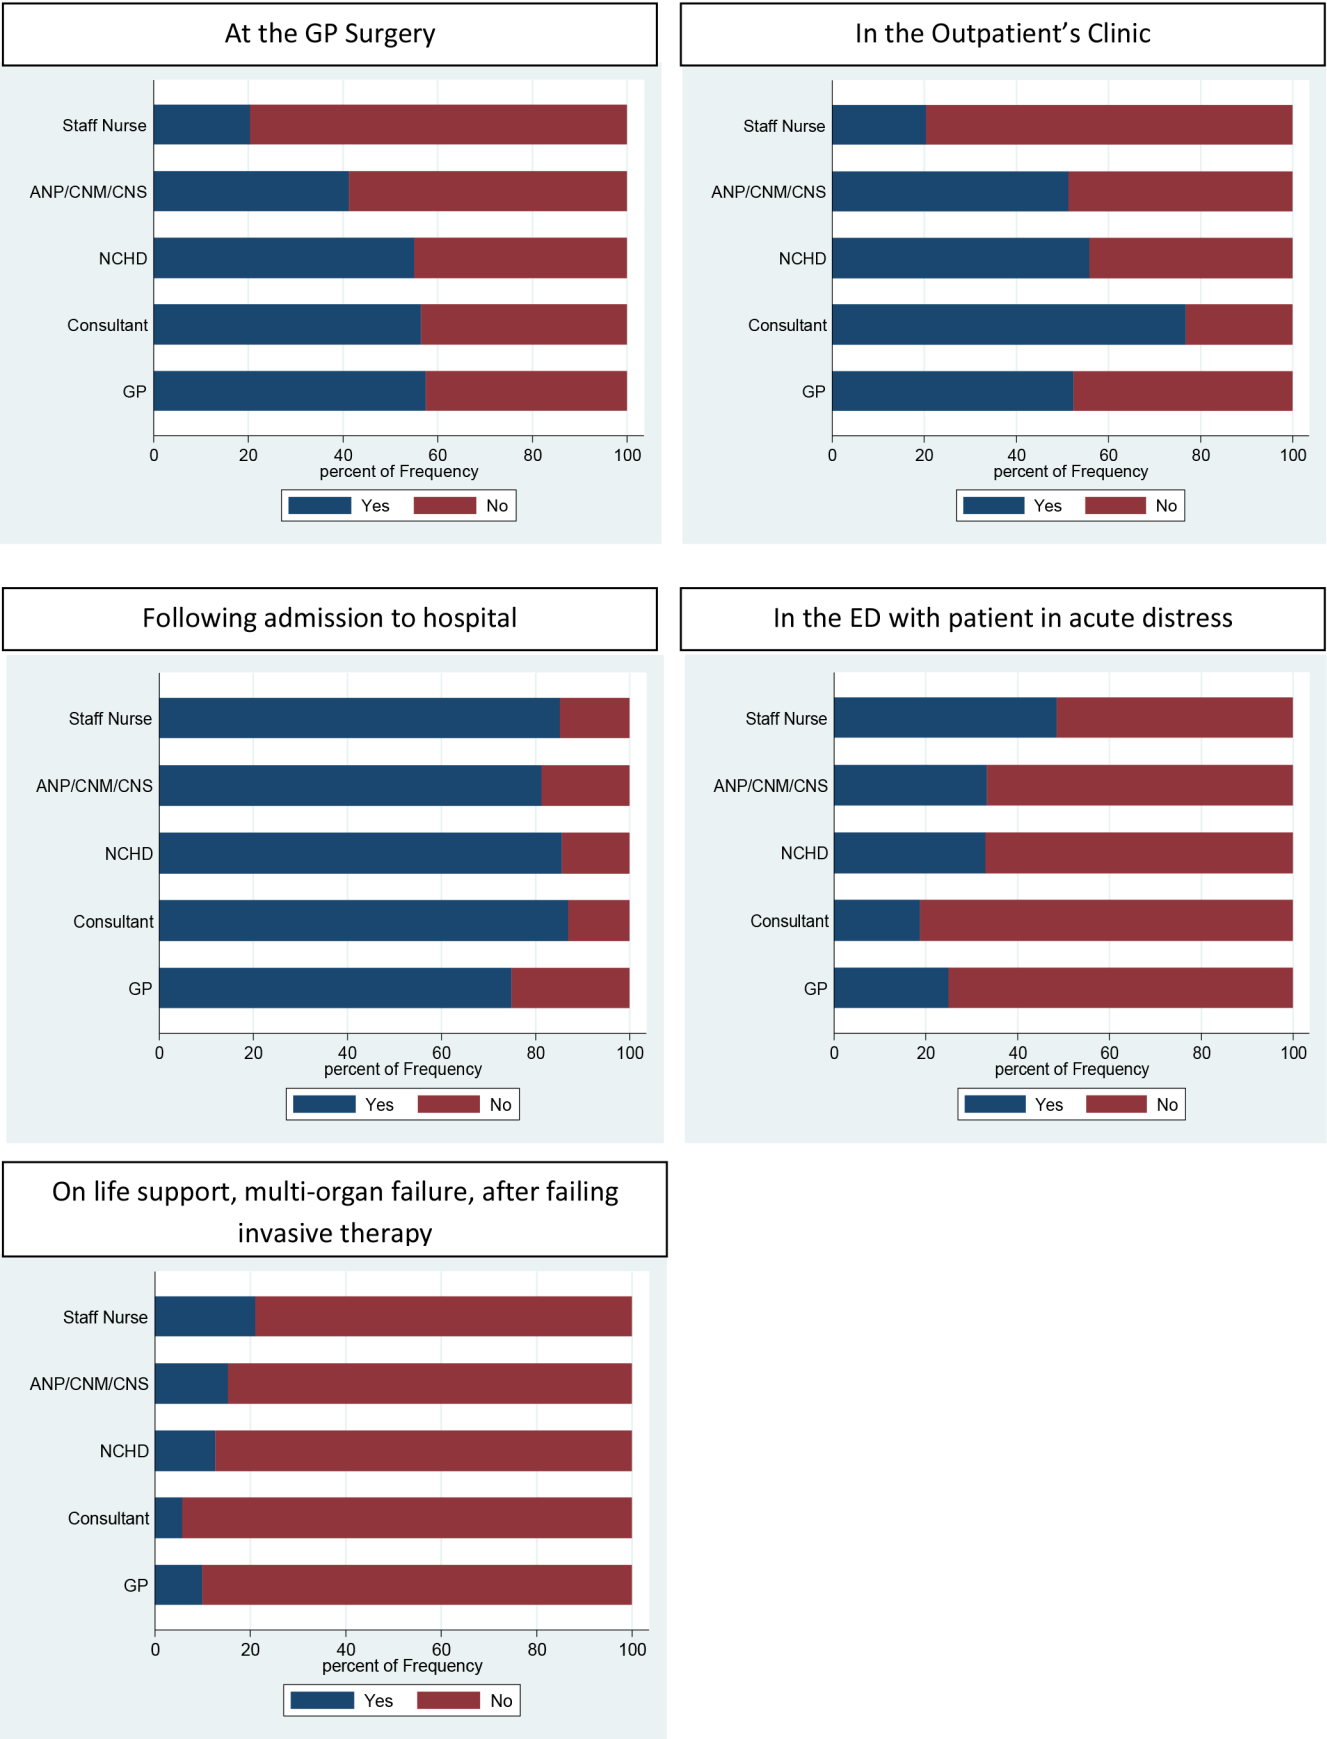

COPD, Chronic Obstructive Pulmonary Disease; GP, General Practitioner (Primary Care Physician); ED, Emergency Department.
