# Supplementary material
Source: HighWire-hosted journal article supplement (https://jme.bmj.com/content/44/3/201)
Supplement: inline-supplementary-material-9 [file inline-supplementary-material-9.pdf]

Supplementary Table 5: Table of Additional Survey Questions (True/ False)

| Question                                                                                                                                                          | <u>Hospital Doctors</u><br>n= 187 |                 | <u>Nurses</u><br>n= 292 |                       | <u>Primary Care Physicians</u><br>n=40 | P value |
|-------------------------------------------------------------------------------------------------------------------------------------------------------------------|-----------------------------------|-----------------|-------------------------|-----------------------|----------------------------------------|---------|
|                                                                                                                                                                   | Consultant<br>n= 69               | NCHDs<br>n= 118 | CNM/CNS/ANP<br>n= 150   | Staff Nurses<br>n=142 |                                        |         |
| <b><u>True/ False Questions:</u></b>                                                                                                                              |                                   |                 |                         |                       |                                        |         |
| <b>A patient has a right to decline a treatment:</b> True/ False/ DK<br>Correct response (True), n (%)                                                            | 69 (100.0)                        | 118 (100.0)     | 150 (100.0)             | 140 (98.6)            | 40 (100.0)                             | 0.26    |
| <b>A patient with decision-making capacity, has a right to make a DNAR order, in the same way they can decline a treatment:</b><br>Correct response (True), n (%) | 61 (88.4)                         | 114 (96.6)      | 133 (88.7)              | 123 (86.6)            | 39 (97.5)                              | 0.03    |
| <b>A DNAR order can be made following direct discussion with a patient who has decision-making capacity:</b><br>Correct response (True), n (%)                    | 62 (89.9)                         | 108 (91.5)      | 139 (92.7)              | 132 (93.0)            | 37 (92.5)                              | 0.95    |

DK, Don't Know;

Supplementary Table 5: Table of Additional Survey Questions (True/ False)

|                                                                                                                                                                                                                                                                           |           |            |            |            |           |       |
|---------------------------------------------------------------------------------------------------------------------------------------------------------------------------------------------------------------------------------------------------------------------------|-----------|------------|------------|------------|-----------|-------|
| <b>In a patient lacking decision-making capacity, who has not expressed their wishes previously, a decision regarding resuscitation can be made in their best interests by their consultant, treating SpR/ Registrar/ GP, commonly in consultation with their family:</b> |           |            |            |            |           |       |
| Correct response (True), n (%)                                                                                                                                                                                                                                            | 67 (97.1) | 114 (96.6) | 147 (98.0) | 136 (95.8) | 34 (85.0) | 0.006 |
